# Supplementary material for: Molecular Investigation of the Stem Snap Point in Textile Hemp
Source: Genes (Basel). 2017 Dec 4;8(12):363. doi: 10.3390/genes8120363 (PMC5748681; doi:10.3390/genes8120363)
Supplement: Supplementary file 1 [file genes-08-00363-s001.xlsx]

## Sheet: Primers
Molecular Investigation of the Stem Snap Point in Textile Hemp
Marc Behr, Sylvain Legay, Jean-Francois Hausman, Stanley Lutts and Gea Guerriero
Targeted genes	Contig	Primer forward	Primer reverse	Amplicon length	PCR efficiency	Regression coefficient
Clathrin	csa_locus_5464_iso_6_len_1880_ver_2 (Mangeot-Peter et al., 2016)	TGTCAGTTTTGTGCCACCAG	TCCATGCGTGTTCTACCAAG	139	1.983	0.998
Cyclophilin	csa_locus_6842_iso_2_len_854_ver_2 (Mangeot-Peter et al., 2016)	ACAACATGTCGAACCCCAAG	TCAGCGGTTTTTGGCGTAAC	106	1.938	0.998
eTIF3E	csa_locus_1028_iso_2_len_1035_ver_2 (Mangeot-Peter et al., 2016)	TTCAGTTCGAGTGCGGTAAC	TCACTGTTTGTGCACAGAGC	76	1.921	0.999
eTIF3H	csa_locus_2110_iso_3_len_914_ver_2 (Mangeot-Peter et al., 2016)	GCGCTGTTGCTTTCTCTTTC	AGAGGCAACTTCTTCCGTTG	124	1.912	0.998
F-box	csa_locus_16122_iso_2_len_2075_ver_2 (Mangeot-Peter et al., 2016)	TATCGGCGGAGAGATTTGAG	TAAGCCCTTCCCTTGATTCC	77	1.995	0.975
Ubiquitin	csa_locus_15458_iso_4_len_411_ver_2	CTAACCGGCAAAACCATCAC	GGTGAATGCCTTCTTTGTCC	91	2.123	0.994
4CL	contig 7103 (Behr et al., 2016)	GGTTGAAATAAGCCCAGACG	TCACCATCCACTTGTTGAGC	126	2.04	0.984
CCoAOMT	contig_5238 (Guerriero et al., 2017a)	TTGACGCTGACAAGGACAAC	TTGTCGTACCCGATTACACC	85	2.073	0.997
CesA4	contig 804 (Behr et al., 2016)	GGGGTGGAATGCTAAGACTG	GGCTTCCATTTCCCCAAAC	130	1.855	0.994
CesA6A	csa_locus_489_iso_1_len_4078_ver_2	GTGATGGGAGAGGTTGAGAAAC	GTGTTCCTTTGGTCTCCATAGC	147	1.999	0.993
CesA7	contig 6418 (Behr et al., 2016)	CCTGATGTCAAGCAATGTGG	TGTATCTTGTGGGGATGCAC	91	1.856	0.989
CesA8	contig 9355 (Behr et al., 2016)	GGGAGCCAAAGGAACCTG	GAGCTGTTCACCACAAGTGTTAC	74	1.869	0.995
EXPA8	contig_5552 (Guerriero et al., 2017)	ACCTTGCTTTGTCCAACGAC	ATGGCACCCTTCTGAAAGAG	135	2.001	0.998
FLA2	Genomic14581056 (Guerriero et al., 2017b)	TGCAAACTGACGGTGAAGAC	ACGGCTCCTTGTCAATCAAC	84	1.977	0.997
FLA3	Genomic scaffold82789 (Guerriero et al., 2017b)	GCCCAAGCACCAATTACATC	TTTTGAGGAGGTGGACGAAG	136	1.966	0.997
FLA6	csa_locus_10214_iso_4_len_1034_ver_2 (Guerriero et al., 2017b)	CAACAATGCTCTGAGGATGC	GGTGGCTTAGCTCCAAAAAG	90	1.955	0.995
FLA8	contig_447 (Guerriero et al., 2017b)	ACGATCACAGCCGTTAAACC	TGGAGCTGGTTTCTTCAACC	75	2	0.989
FLA24	csa_locus_21128_iso_2_len_1310_ver_2 (Guerriero et al., 2017b)	CGATCTCCTTCGTATGGTTG	TGACACCTCTGGAAGCCTAAG	83	1.92	0.965
LAC4	contig 5768 (Behr et al., 2016)	AATGGACTCTTCCATAATTCGAC	TCGGACTCTACATTCAACCAAAG	79	2.066	0.975
MET2	EST00068 Hemp Uni-ZAP XR cDNA library Cannabis sativa cDNA clone 14C9	TGAAGTGAAGCCTGCCCTTAG	ATGGCAGAAAACGAGCTCAC	92	1.902	0.999
MYB46-1	csa_locus_9526_iso_4_len_1876_ver_2	ACATGGCCAGTTTCTGCTTC	GTTGTTGTAGTGGCTGGATGAG	105	1.899	0.994
NST1	contig 13708 (Behr et al., 2016)	CCTGGCTTCAGATTTCATCC	TATCCCAGGGTTCGAGTTTG	130	1.765	0.998
PAL	contig 17365 (Behr et al., 2016)	CGTGGAACAATCACTGCATC	ACCCACTGCCTTTGAGTTTG	90	1.949	0.996
PLR	csa_locus_7888_iso_7_len_1217_ver_2	CTCCGCTTCTTTCAATGACC	ATATGGTGGCTTCGGAGATG	102	2.288	0.971
PRX4	csa_locus_62063_iso_1_len_967_ver_2	TACCACAGCAAGCAAATCCG	CCTTTGCGGCCAAACAAATC	90	1.84	0.99
PRX72	csa_locus_10948_iso_2_len_1210_ver_2	TGCACGAGTTTCAGGCAAAG	TCGGTTTCTAAGCTGTGCAG	96	2.054	0.983
SAM	csa_locus_10479_iso_4_len_1500_ver_2	TGGTTTACATCGAGCAGCAG	TCACCAGCTCCAATTTCCTC	88	2.007	0.997
WAT1	contig 3134 (Behr et al., 2016)	CCATTTTATACGCGGGAGTG	GCCATGATAGCGACAACAAG	130	1.899	0.999

## Sheet: Figure 1
Molecular Investigation of the Stem Snap Point in Textile Hemp
Marc Behr, Sylvain Legay, Jean-Francois Hausman, Stanley Lutts and Gea Guerriero
									t-test
		Average values and Tukey post-hoc test							IN			OUT
Average CNRQ	p-value ANOVA or Kruskall-Wallis	SP1-IN	SP2-IN	SP3-IN	SP1-OUT	SP2-OUT	SP3-OUT		SP2/SP1	SP3/SP1	SP3/SP2	SP2/SP1	SP3/SP1	SP3/SP2
4CL	0.002	1.62 (ab)	4.69 (b)	5.29 (b)	0.12 (a)	1.36 (ab)	2.10 (b)		0.188719	0.0729876	0.438228	0.0787779	0.00232103	0.21731
MET2	0	1.51 (b)	5.44 (b)	4.53 (b)	0.09 (a)	1.05 (ab)	2.40 (b)		0.162571	0.025595	0.408452	0.114383	0.000473615	0.0742343
PAL	0.037	1.4	3.58	3.44	0.27	1	1.6		0.220409	0.0706141	0.48004	0.063682	9.6231e-05	0.108628
SAM1	0	1.71 (bc)	5.86 (bc)	5.75 (c)	0.09 (a)	0.65 (ab)	2.40 (bc)		0.198275	0.0471419	0.491387	0.0456344	0.00471418	0.0200086
CCoAOMT	0.016	1.37	2.68	2.53	0.27	0.98	1.16		0.174861	0.0733539	0.452262	0.067316	0.0033656	0.354772
LAC4	0.002	2.35 (b)	4.76 (b)	3.67 (b)	0.12 (a)	1.28 (ab)	1.91 (b)		0.214716	0.203226	0.34487	0.0544801	0.00221297	0.209249
MYB46-1	0.016	2.17	3.63	3.11	0.16	1.05	0.98		0.177505	0.222457	0.357109	0.0702343	0.0494692	0.456713
CESA7	0.051	1.6	3.18	3.1	0.39	1.01	2.05		0.174835	0.0815613	0.477767	0.0828479	0.00500401	0.043862
CESA8	0.115	1.57	2.66	2.51	0.4	1.32	1.76		0.252759	0.197478	0.45746	0.045702	0.0031681	0.198782
NST1	0.001	1.48 (bc)	1.87 (bc)	2.07 (b)	0.34 (a)	0.69 (abc)	1.35 (bc)		0.239999	0.197735	0.389126	0.104681	0.00110832	0.0323974
CESA4	0.019	0.87 (ab)	1.93 (ab)	2.90 (b)	0.43 (a)	1.09 (ab)	1.73 (ab)		0.142636	0.035551	0.184246	0.0662577	0.0162856	0.13922
CESA6A	0.032	1.42 (b)	1.39 (ab)	1.48 (b)	0.91 (ab)	0.99 (ab)	0.58 (a)		0.473496	0.431746	0.427634	0.39984	0.108572	0.104135
FLA2	0.015	1.91 (ab)	2.00 (b)	2.13 (ab)	0.81 (ab)	0.75 (ab)	0.50 (a)		0.45478	0.426406	0.459037	0.432951	0.189079	0.207599
FLA6	0.025	2.20 (b)	1.58 (ab)	1.61 (ab)	1.31 (ab)	0.98 (ab)	0.36 (a)		0.208173	0.275346	0.481326	0.216783	0.00400533	0.0625352
EXPA8	0.403	2.12	1.12	1.17	2.29	1.21	0.8		0.148263	0.196747	0.473776	0.0683527	0.0222799	0.225641
FLA8	0.363	1.01	1.04	1.12	1.41	1.16	0.72		0.425894	0.368309	0.406444	0.280897	0.0599976	0.0580765
FLA24	0.004	0.82 (ab)	0.74 (a)	0.84 (ab)	1.34 (b)	1.36 (b)	1.24 (ab)		0.29641	0.448203	0.297335	0.457183	0.270085	0.220637
PRX4	0.002	0.51	0.88	0.52	2.21	2.28	1.54		0.0888005	0.473144	0.0451871	0.408678	0.0575829	0.0602131
PRX72	0.017	1.06 (a)	0.47 (a)	0.28 (a)	5.44 (a)	7.26 (a)	3.12 (a)		0.153336	0.0776832	0.254368	0.341968	0.262478	0.129349
PLR	0	1.02 (bc)	0.86 (ab)	0.27 (a)	3.53 (c)	2.12 (bc)	1.34 (bc)		0.286825	0.00250146	0.0261746	0.0342489	0.0142804	0.165786
FLA3	0.008	0.12	0.49	10.02	0.15	3.09	80.43		0.0966533	0.0120658	0.014097	0.11697	0.0116244	0.0135955
WAT1	0.075	0.72	1.02	1.03	0.98	1.33	1.36		0.22028	0.131873	0.493026	0.00413831	0.058791	0.432074
CNRQ: Calibrated Normalised Relative Quantity. CNRQs are the normalised relative expression values exported from qBasePLUS (Hellemans et al., 2007)
For genes without normally distributed expression (Levene test p-value<0.05), a Kruskall-Wallis test was performed (value indicated in italics).
Tukey post-hoc test results are indicated when ANOVA p-value<0.05. Within one row, different letters indicate statistically significant differences.
Student t-test with four biological replicates, p-value<0.05 is indicated by green cells.
